# Supplementary material for: Chicago sky blue gel for better visualization of Demodex in patients with Demodex blepharitis
Source: PeerJ. 2023 Nov 17;11:e16378. doi: 10.7717/peerj.16378 (PMC10658889; doi:10.7717/peerj.16378)
Supplement: Data S1 [file peerj-11-16378-s001.xlsx]

## Sheet: Sheet1
No	Gender	Age	BMI	U_HT	U_DM	U_DLP	U_CVA	U_Cancer	U_none	U_others	Investigator1		Investigation2
											no CSB	with CSB	no CSB	with CSB
1	M	43	22.99							1	2	4	1	2
2	F	68	20.74							1	0	2	0	0
3	F	66	21.16			1					1	3	1	2
4	F	73	24.89						1		0	1	1	1
5	F	56	24	1		1	1				0	2	2	1
6	M	73	27.51						1		1	1	1	1
7	F	52	25.14							1	0	6	1	2
8	F	82	23.06	1		1					0	2	1	2
9	F	81	27.11	1		1				1	0	1	0	0
10	F	51	20.61			1					1	4	1	4
11	F	62	24.8016	1		1					2	7	1	1
12	F	70	18.37	1		1					0	2	0	0
13	F	65	23.8751						1		1	2	0	1
14	F	45	22.231	1		1					1	2	1	2
15	M	26	23.88						1		1	2	1	2
16	F	68	26.67						1		1	1	1	1
17	F	62	25.57	1		1	1				0	2	0	2
18	F	78	22.1	1	1					1	0	1	0	1
19	F	68	22.77					1			2	3	2	2
20	M	65	17.6			1					1	3	1	1
21	F	61	24.44		1						4	7	2	2
22	F	55	21.7993	1		1					0	2	1	1
23	F	64	21.33						1		2	4	1	4
24	M	62	20.01			1				1	0	3	0	2
25	F	66	27.85			1					0	3	0	1
26	F	25	18.37						1		0	5	0	0
27	F	47	24.61				1			1	1	2	1	1
28	F	50	22.4082	1		1					1	3	1	2
29	F	65	28.02						1		3	3	0	0
30	F	64	25.81	1		1					3	3	2	3
